# Supplementary material for: Vapor selenization produced Bi2Se3 nanoparticles in carbon fiber 3D network as binder-free anode for flexible lithium-ion batteries
Source: Royal Society of Chemistry journal article supplement (doi:10.1039/d0qm00884b), 2021-01-01
Supplement: d0qm00884b1.pdf [file d0qm00884b1.pdf]

## Electronic Supplementary Information

### **Vapor Selenization Produced Bi<sub>2</sub>Se<sub>3</sub> Nanoparticles in Carbon Fibers 3D Network as Binder-Free Anode for Flexible Lithium-Ion Batteries**

Hong-Qing Qu,<sup>†a</sup> Hong Yin,<sup>†a,b,c</sup> Ya-Long Wang,<sup>a</sup> Cheng Fan,<sup>a</sup> Kwun Nam Hui,<sup>b</sup> Chong Li\*<sup>a</sup> and Ming-Qiang Zhu<sup>a</sup>

<sup>a</sup>Wuhan National Laboratory for Optoelectronics (WNLO), School of Optics and Electronic Information, Huazhong University of Science and Technology, Wuhan 430074, China

<sup>b</sup>Institute of Applied Physics and Materials Engineering, University of Macau, Avenidada Universidade, Taipa, Macau, China

<sup>c</sup>Department of Bioengineering, University of California, Los Angeles, Los Angeles, CA 90095, USA

\*Corresponding Authors

E-mail: chongli@hust.edu.cn

<sup>†</sup>These authors contributed equally to the work.

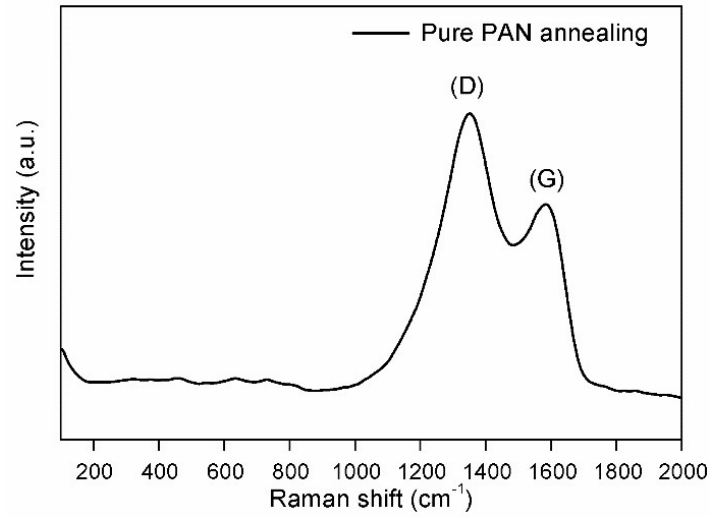

**Fig. S1.** Raman spectra of the pure PAN after annealing at 700 °C for 6 h.

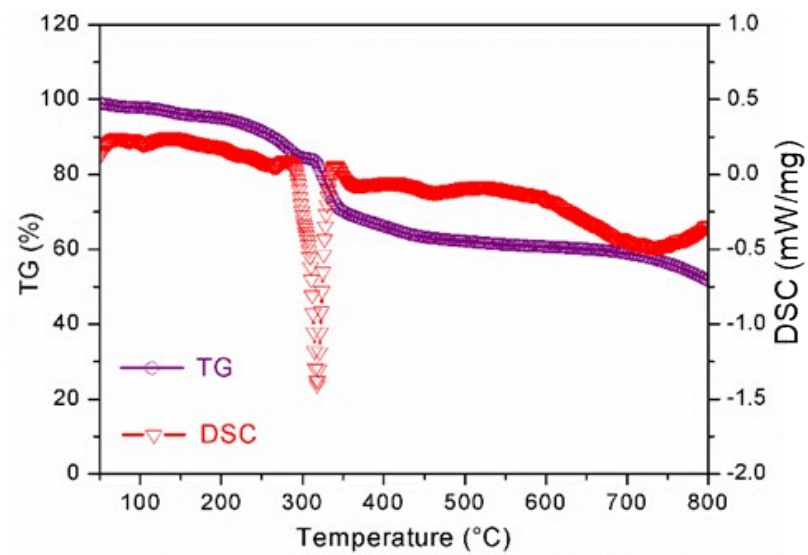

**Fig. S2.** TGA-DSC curves of the BiCl<sub>3</sub>/PAN.

**Depiction S1**

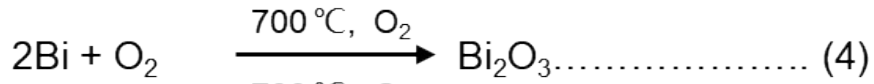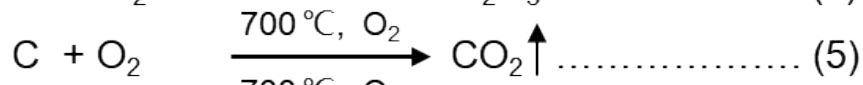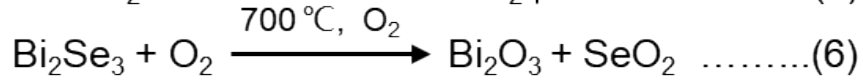

The content of Bi nanoparticles in Bi/CNFs can be calculated by calculation combining equation (4) and (5). In the same way, the content of Bi<sub>2</sub>Se<sub>3</sub> nanoparticles in Bi<sub>2</sub>Se<sub>3</sub>/CNFs can be calculated by calculation combining equation (6).

$$\text{Bi (\%)} = \frac{\text{Final weight of Bi}_2\text{O}_3}{\text{Initial weight of Bi/CNFs}} \times \frac{\text{Molecular weight of Bi} \times 2}{\text{Molecular weight of Bi}_2\text{O}_3} \times 100\%$$

$$\text{Bi}_2\text{Se}_3 (\%) = \frac{\text{Final weight of Bi}_2\text{O}_3}{\text{Initial weight of Bi}_2\text{Se}_3/\text{CNFs}} \times \frac{\text{Molecular weight of Bi}_2\text{Se}_3}{\text{Molecular weight of Bi}_2\text{O}_3} \times 100\%$$

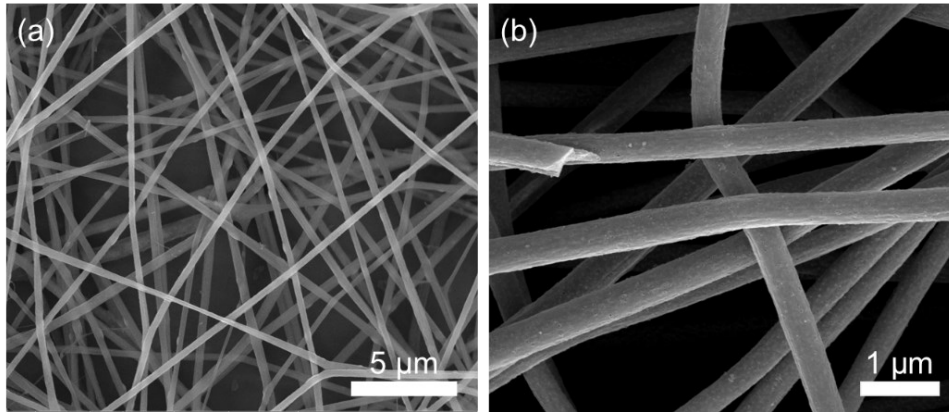

**Fig. S3.** SEM images of (a) BiCl<sub>3</sub>/PAN and (b) Bi/CNFs.

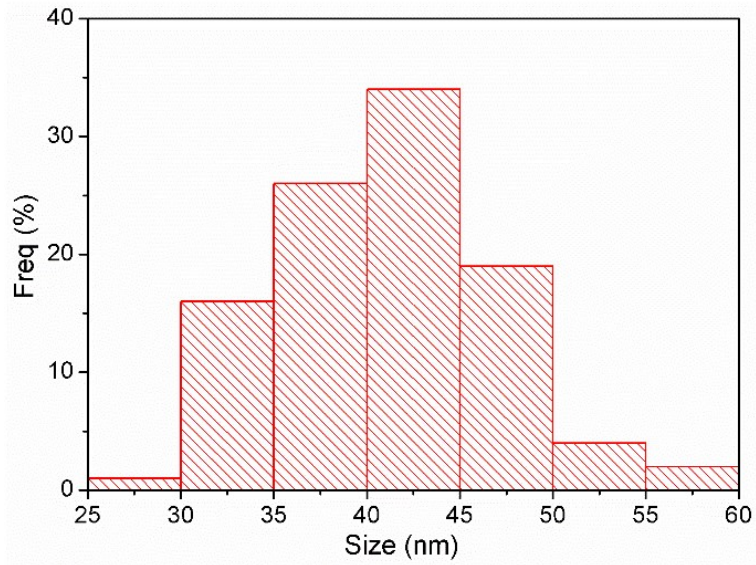

**Fig. S4.** The particle size distribution of Bi<sub>2</sub>Se<sub>3</sub> nanoparticles.

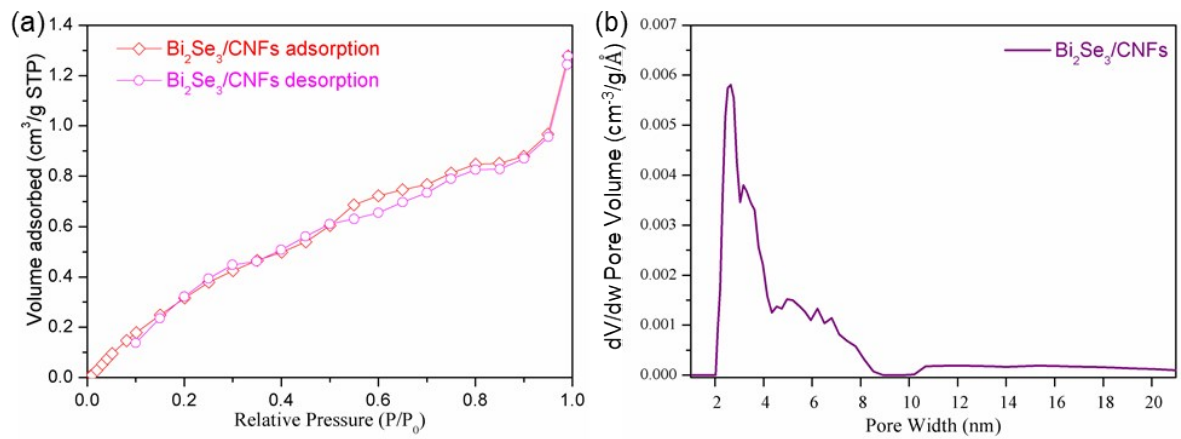

**Fig. S5.** (a) N<sub>2</sub> adsorption-desorption isotherms and (b) the pore size distribution of the Bi<sub>2</sub>Se<sub>3</sub>/CNFs.

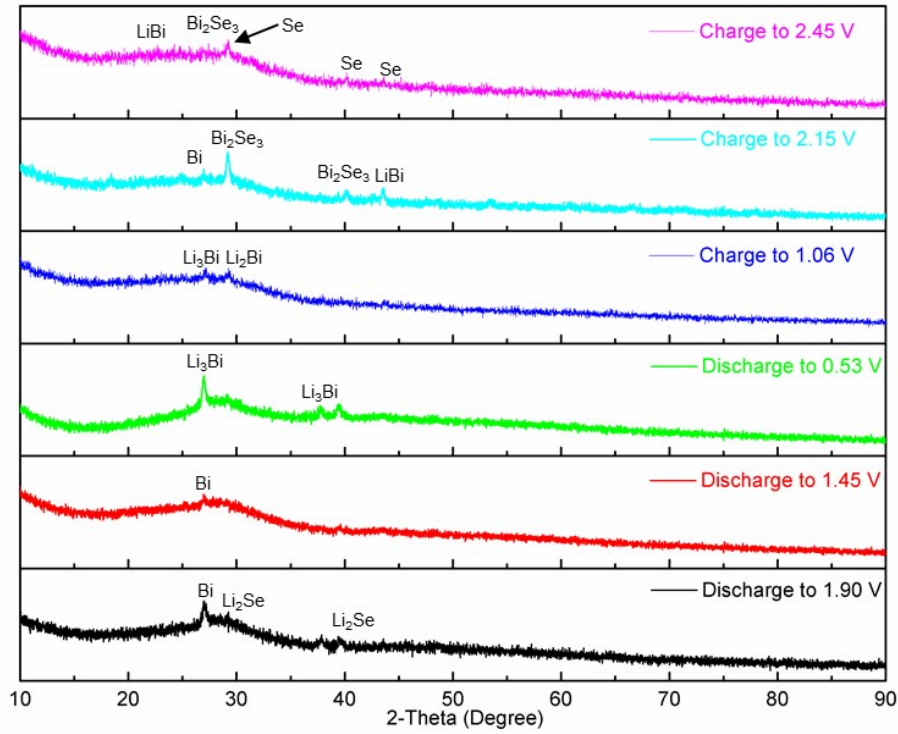

**Fig. S6.** The ex-situ XRD patterns of a new battery discharged and charged to different voltage platforms in the third cycle with Cu K $\alpha$ 1 (40 kV, 40 mA,  $10^\circ < 2\theta < 90^\circ$ )

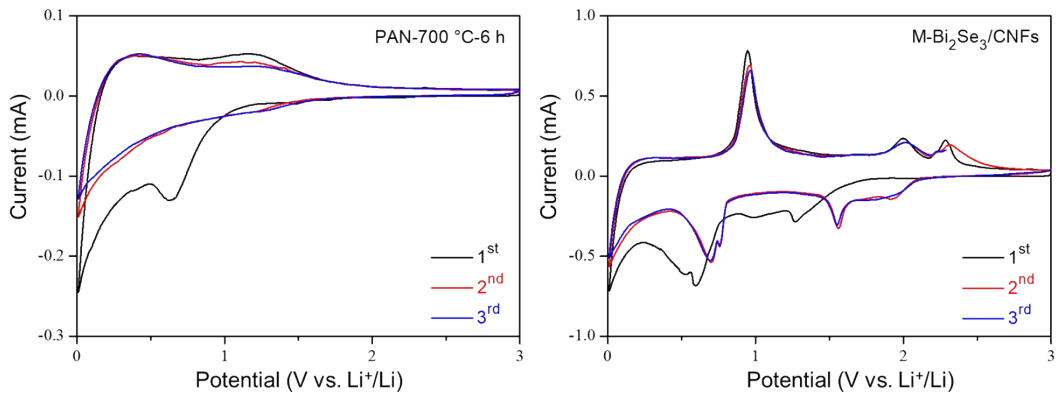

**Fig. S7.** CV curves of the (a) PAN was annealed at 700 °C for 6 h and (b) M-Bi<sub>2</sub>Se<sub>3</sub>/CNFs electrode from 3.0 V to 0.01 V vs. Li<sup>+</sup>/Li at a scan rate of 0.1 mV s<sup>-1</sup>.

**Table S1.** The specific capacity of our work for LIBs vs. previous works.

| Sample                                                 | Current                | Cycles | Capacity vs Li <sup>+</sup><br>(mAh g <sup>-1</sup> ) | Ref.        |
|--------------------------------------------------------|------------------------|--------|-------------------------------------------------------|-------------|
| Bi <sub>2</sub> Se <sub>3</sub> rectangular nanosheets | 50 mA g <sup>-1</sup>  | 50     | 34                                                    | [1]         |
| Bi <sub>2</sub> Se <sub>3</sub> stacking nanosheets    | 50 mA g <sup>-1</sup>  | 50     | 45                                                    | [2]         |
| In-doped Bi <sub>2</sub> Se <sub>3</sub>               | 50 mA g <sup>-1</sup>  | 50     | 160.3                                                 | [3]         |
| Hierarchical Bi <sub>2</sub> Se <sub>3</sub> microrods | 50 mA g <sup>-1</sup>  | 50     | 36                                                    | [4]         |
| Bi <sub>2</sub> Se <sub>3</sub> nanosheets             | 50 mA g <sup>-1</sup>  | 50     | 66.1                                                  | [5]         |
| Bi <sub>2</sub> Se <sub>3</sub> /Graphene              | 50 mA g <sup>-1</sup>  | 100    | 203.6                                                 | [6]         |
| S-doped Bi <sub>2</sub> Se <sub>3</sub>                | 200 mA g <sup>-1</sup> | 100    | 109.4                                                 | [7]         |
| CNTs@C@Bi <sub>2</sub> Se <sub>3</sub>                 | 100 mA g <sup>-1</sup> | 100    | 431                                                   | [8]         |
|                                                        | 2 A g <sup>-1</sup>    | 100    | 222                                                   |             |
| Bi <sub>2</sub> Se <sub>3</sub> @NC                    | 100 mA g <sup>-1</sup> | 50     | 410.6                                                 | [9]         |
|                                                        | 500 mA g <sup>-1</sup> | 400    | 335.8                                                 |             |
| Flexible Bi <sub>2</sub> Se <sub>3</sub> /CNFs         | 100 mA g <sup>-1</sup> | 100    | 443                                                   | Our<br>work |
|                                                        | 400 mA g <sup>-1</sup> | 100    | 308                                                   |             |
|                                                        | 2 A g <sup>-1</sup>    | 100    | 189                                                   |             |
|                                                        | 16 A g <sup>-1</sup>   | 100    | 103                                                   |             |

## Depiction S2

*Synthesis of  $\text{Bi}_2\text{Se}_3$  nanosheets:* 0.75 g  $\text{Bi}(\text{NO}_3)_3 \cdot 5\text{H}_2\text{O}$ , 1.0 g of  $\text{SeO}_2$  and 1.0 g of glucose were dissolved in an appropriate amount of deionized water and continuously stirred to obtain the mixed solution A. After continuous stirring to completely dissolve the powders, 20 mL ethanolamine was added to solution A under magnetic stirring, and mixed solution B was obtained after uniform stirring. Transfer the mixed solution B to a 60 mL Teflon stainless steel reactor and add deionized water until it reaches 80% of the total volume. The autoclave reacts for 30 h at 180 °C, and after natural cooling, the filtered products are washed several times with distilled water and anhydrous ethanol, and then dried for 6 hours in a vacuum drying oven at 60 °C.<sup>10</sup>

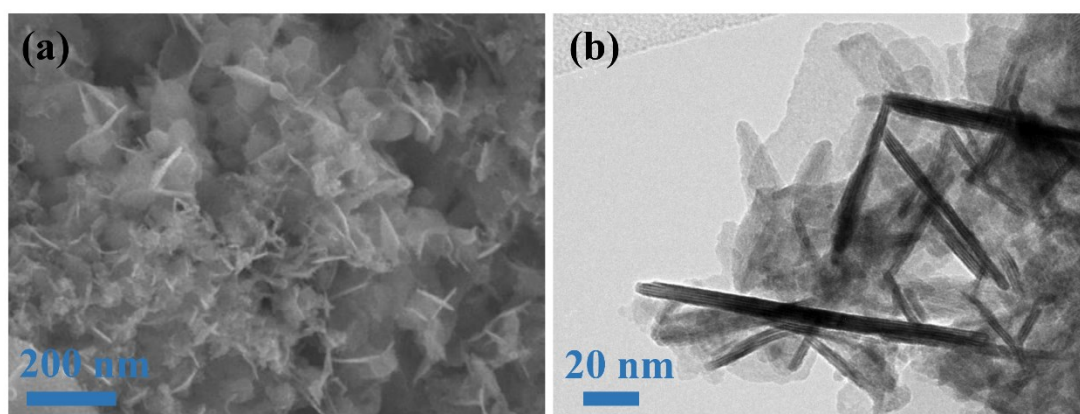

**Fig. S8.** (a) SEM image of  $\text{Bi}_2\text{Se}_3$  nanosheets. (b) TEM image of  $\text{Bi}_2\text{Se}_3$  nanosheets.

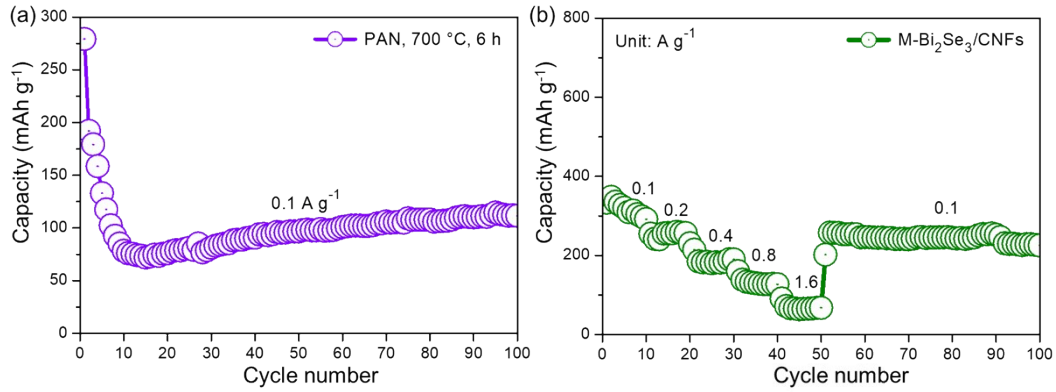

**Fig. S9.** (a) The specific discharge capacity of pure carbon nanofibers at a cycling rate of  $0.1 \text{ A g}^{-1}$ . (b) Rate capability of the  $\text{M-Bi}_2\text{Se}_3/\text{CNFs}$  electrode at various current rates from  $0.1 \text{ A g}^{-1}$  to  $1.6 \text{ A g}^{-1}$ .

### Depiction S3

The diffusion coefficient of lithium ions and electric conductivity in open circuit state are calculated by the following formula:

$$D = R^2 T^2 / 2 A^2 n^4 F^4 C^2 \sigma^2 \dots\dots (1) \quad Z_{\text{Re}} = K + \sigma \omega^{-1/2} \dots\dots (2)$$

where  $D$  is the diffusion coefficient ( $\text{cm}^2 \text{ s}^{-1}$ ),  $R$  is the gas constant ( $8.31 \text{ J mol}^{-1} \text{ K}^{-1}$ ),  $T$  is the absolute temperature (298 K),  $A$  is the surface area of the cathode ( $0.5 \text{ cm}^2$ ),  $n$  is the number of electrons transferred in the half-reaction for the redox couple,  $F$  is the Faraday constant ( $96485 \text{ C mol}^{-1}$ ),  $C$  is the molar concentration of Li-ions in  $\text{Bi}_2\text{Se}_3/\text{CNFs}$  electrode,  $K$  is a constant,  $\omega$  is frequency, and  $\sigma$  is the Warburg factor which corresponds to the slope of the curve shown in **Fig. 6b**.<sup>11,12</sup>

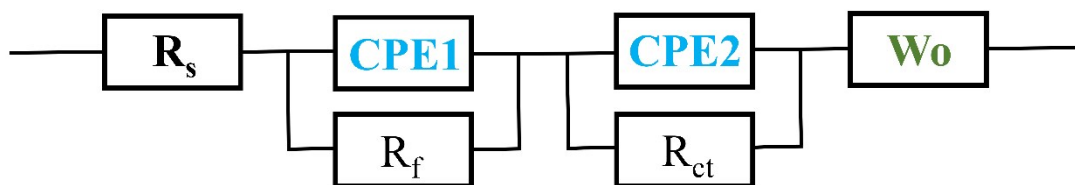

**Fig. S10.** Equivalent circuit diagram of Electrochemical Impedance Spectroscopy



**Table S2.** The linear correlation fitting results of Bi<sub>2</sub>Se<sub>3</sub>/CNFs, M-Bi<sub>2</sub>Se<sub>3</sub>/CNFs and Bi<sub>2</sub>Se<sub>3</sub> nanosheets electrodes, respectively.

| Sample    | Bi <sub>2</sub> Se <sub>3</sub> /CNFs | M-Bi <sub>2</sub> Se <sub>3</sub> /CNFs | Bi <sub>2</sub> Se <sub>3</sub> Nanosheets |
|-----------|---------------------------------------|-----------------------------------------|--------------------------------------------|
| Intercept | 67.6                                  | 111.2                                   | 84.8                                       |
| Slope     | <b>17.6</b>                           | <b>60.3</b>                             | <b>250.3</b>                               |

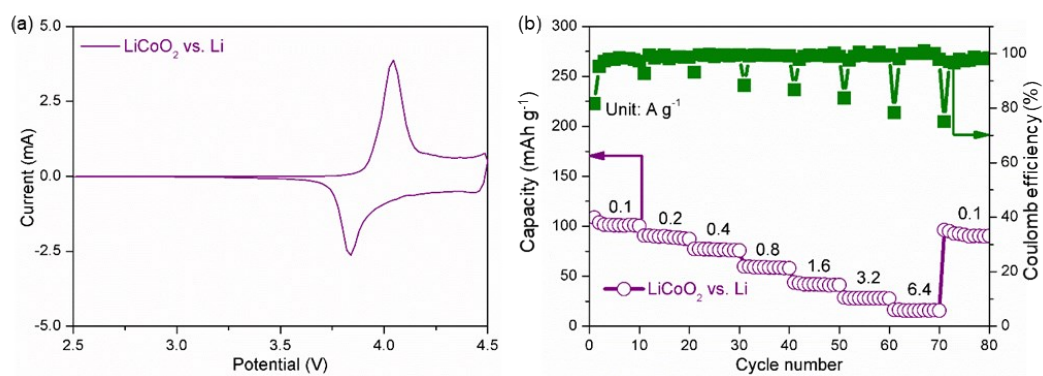

**Fig. S11.** (a) The CV curve with a sweep speed of 0.1 mV s<sup>-1</sup> and (b) rate performance of LiCoO<sub>2</sub> cathode with current density from 0.1 A g<sup>-1</sup> to 6.4 A g<sup>-1</sup>.

## References:

1. Ali Z, Cao C, Li J, Wang Y, Cao T, M. Tanveer, Muhammad Tahir, Faryal Idrees, Faheem K. Butt, Effect of synthesis technique on electrochemical performance of bismuth selenide, *J. Power Sources*, 2013, **229**, 216-222.
2. Xu H, Chen G, Jin R, Chen D, Wang Y, and Jian Pei, Green synthesis of  $\text{Bi}_2\text{Se}_3$  hierarchical nanostructure and its electrochemical properties, *Rsc Adv.*, 2014, **4**, 8922-8929.
3. G. Han, Z. Chen, D. Ye, L. Yang, L. Wang, J. Drennan and J. Zou, In-doped  $\text{Bi}_2\text{Se}_3$  hierarchical nanostructures as anode materials for Li-ion batteries, *J. Mater. Chem. A*, 2014, **2**, 7109-7116.
4. Xu H, Chen G, Jin R, Pei J, Wang Y, and Chen D, Hierarchical  $\text{Bi}_2\text{Se}_3$  microrods: microwave-assisted synthesis, growth mechanism, and their related properties, *CrstyEngComm*, 2013, **15**, 1618-1625.
5. R. Jin, J. Liu, Y. Xu, G. Li, G. Chen and L. Yang, Hierarchical  $\text{Bi}_2\text{Se}_{3-x}\text{S}_x$  microarchitectures assembled from ultrathin polycrystalline nanosheets: solvothermal synthesis and good electrochemical performance, *J Mater. Chem. A.*, 2013 **1**, 10942-10950.
6. X. Chen, H. Tang, Z. Huang, J. Zhou, X. Ren, K. Huang, X. Qi and J. Zhong, Flexible Bismuth Selenide/Graphene composite paper for lithium-ion batteries, *Ceram. Int.*, 2017, **43**, 1437-1442.
7. F. Mao, J. Guo, S. Zhang, F. Yang, Q. Sun, J. Ma and Z. Li, Solvothermal synthesis and electrochemical properties of S-doped  $\text{Bi}_2\text{Se}_3$  hierarchical microstructure assembled by stacked nanosheets, *Rsc Adv.*, 2016, **6**, 38228-38232.
8. R. Jin, M. Sun, G. Li, CNTs@C@ $\text{Bi}_2\text{Se}_3$  composite as an improved-performance anode for lithium ion batteries, *Ceram. Int.*, 2017, **43**, 17093-17099.
9. Z. Li, H. Pan, W. Wei, A. Dong, K. Zhang, H. Lv and X. He, Bismuth metal-organic frameworks derived bismuth selenide nanosheets/nitrogen-doped carbon hybrids as anodes for Li-ion batteries with improved cyclic performance, *Ceram. Int.*, 2019, **45**, 11861-11867.
10. H. Fan, S. Zhang, P. Ju, H. Su and S. Ai, Flower-like  $\text{Bi}_2\text{Se}_3$  nanostructures: Synthesis and their application for the direct electrochemistry of hemoglobin and  $\text{H}_2\text{O}_2$  detection, *Electrochim. Acta*, 2012, **64**, 171-176.
11. H. Yin, H. Q. Qu, Z. Liu, R. Z. Jiang, C. Li and M. Q. Zhu, Long cycle life and high rate capability of three dimensional  $\text{CoSe}_2$  grain-attached carbon nanofibers for flexible sodium-ion batteries, *Nano Energy*, 2019, **58**, 715-723.

12. H. Yin, M. Cao, X. Yu, H. Zhao, Y. Shen, C. Li and M. Zhu, Self-standing Bi<sub>2</sub>O<sub>3</sub> nanoparticles/carbon nanofiber hybrid films as a binder-free anode for flexible sodium-ion batteries, *Mater. Chem. Front.*, 2017, **1**, 1615-1621.
